# Supplementary material for: Maize opaque10 Encodes a Cereal-Specific Protein That Is Essential for the Proper Distribution of Zeins in Endosperm Protein Bodies
Source: PubMed Central journal article supplement (PMC4991801; doi:10.1371/journal.pgen.1006270), 2016-08-19
Supplement: pgen.1006270.s003.pdf [file pgen.1006270.s003.pdf]

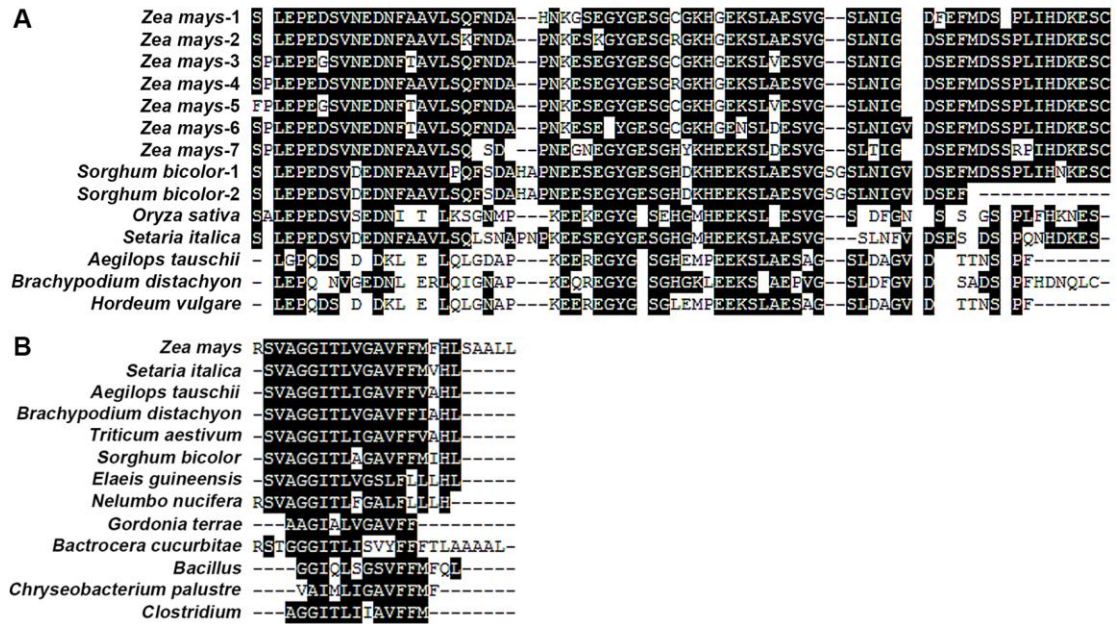

**S3 Fig. Sequence alignment of the proteins.** (A) Sequence alignment of seven O10 repeats and the homologous sequence in other cereal species. (B) Sequence alignment of the transmembrane domain of O10 and its homologous sequence in other species.
