# Supplementary material for: Maize opaque10 Encodes a Cereal-Specific Protein That Is Essential for the Proper Distribution of Zeins in Endosperm Protein Bodies
Source: PubMed Central journal article supplement (PMC4991801; doi:10.1371/journal.pgen.1006270), 2016-08-19
Supplement: pgen.1006270.s004.pdf [file pgen.1006270.s004.pdf]

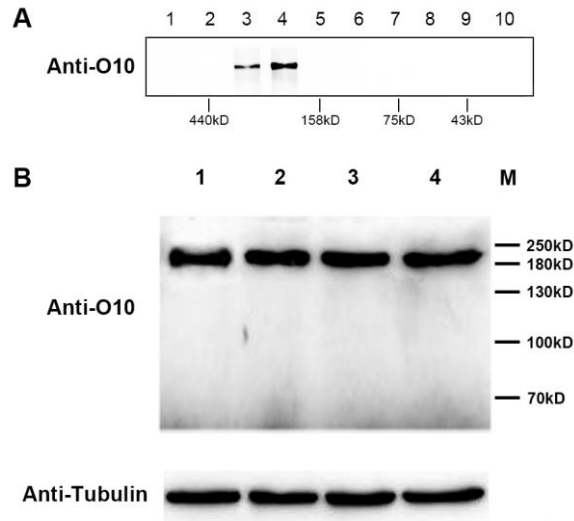

**S4 Fig. Immunoblots and SDS-PAGE were used to analyze the molecular weight of O10.**

(A) Immunoblot analysis of O10 in separated proteins with anti-O10 antibody. The total protein of maize kernel (21 DAP) was separated into 10 parts by gel filtration chromatography. The bands of 43 kD, 75 kD, 158 kD and 440 kD were the gel filtration markers. (B) Immunoblot analysis of the O10 molecular weight by adding different denaturants and reducing agents before the thermal denaturation of samples. Panel 1, 10% (W/V) SDS; Panel 2, 10% (W/V) SDS + 100 mM DTT; Panel 3, 10% (W/V) SDS + 5% (V/V)  $\beta$ -Mercaptoethanol; Panel 4, 10% (W/V) SDS + 8 M urea.
