# Supplementary material for: Maize opaque10 Encodes a Cereal-Specific Protein That Is Essential for the Proper Distribution of Zeins in Endosperm Protein Bodies
Source: PubMed Central journal article supplement (PMC4991801; doi:10.1371/journal.pgen.1006270), 2016-08-19
Supplement: pgen.1006270.s005.pdf [file pgen.1006270.s005.pdf]

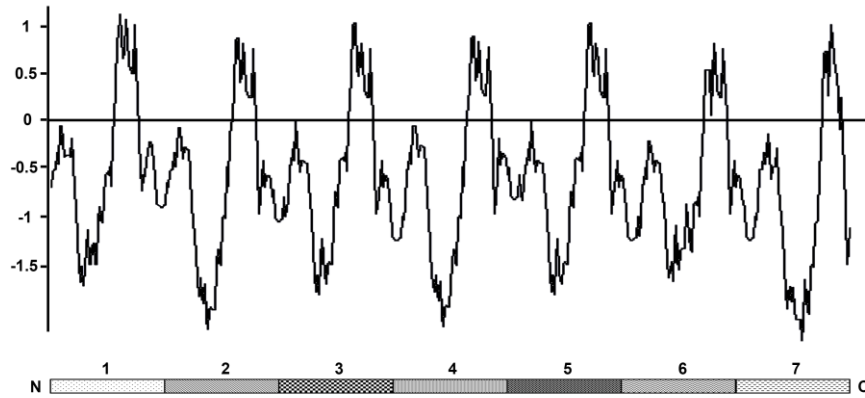

**S5 Fig. Kyte-Doolittle Hydropathy Analysis of the seven-repeat domain of O10.** The hydropathy characteristics of the seven-repeat domain of O10 were determined by the method of Kyte and Doolittle (<http://ca.expasy.org/tools/protscale.html>).
