# Supplementary material for: Maize opaque10 Encodes a Cereal-Specific Protein That Is Essential for the Proper Distribution of Zeins in Endosperm Protein Bodies
Source: PubMed Central journal article supplement (PMC4991801; doi:10.1371/journal.pgen.1006270), 2016-08-19
Supplement: pgen.1006270.s006.pdf [file pgen.1006270.s006.pdf]

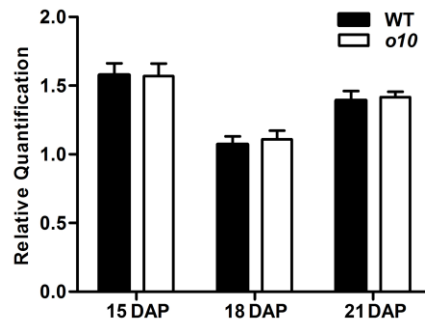

**S6 Fig. The expression of *O10* in the wild-type and mutant kernels during maize kernel development.** Ubiquitin was used as the internal control.
