# Supplementary material for: Maize opaque10 Encodes a Cereal-Specific Protein That Is Essential for the Proper Distribution of Zeins in Endosperm Protein Bodies
Source: PubMed Central journal article supplement (PMC4991801; doi:10.1371/journal.pgen.1006270), 2016-08-19
Supplement: pgen.1006270.s007.pdf [file pgen.1006270.s007.pdf]

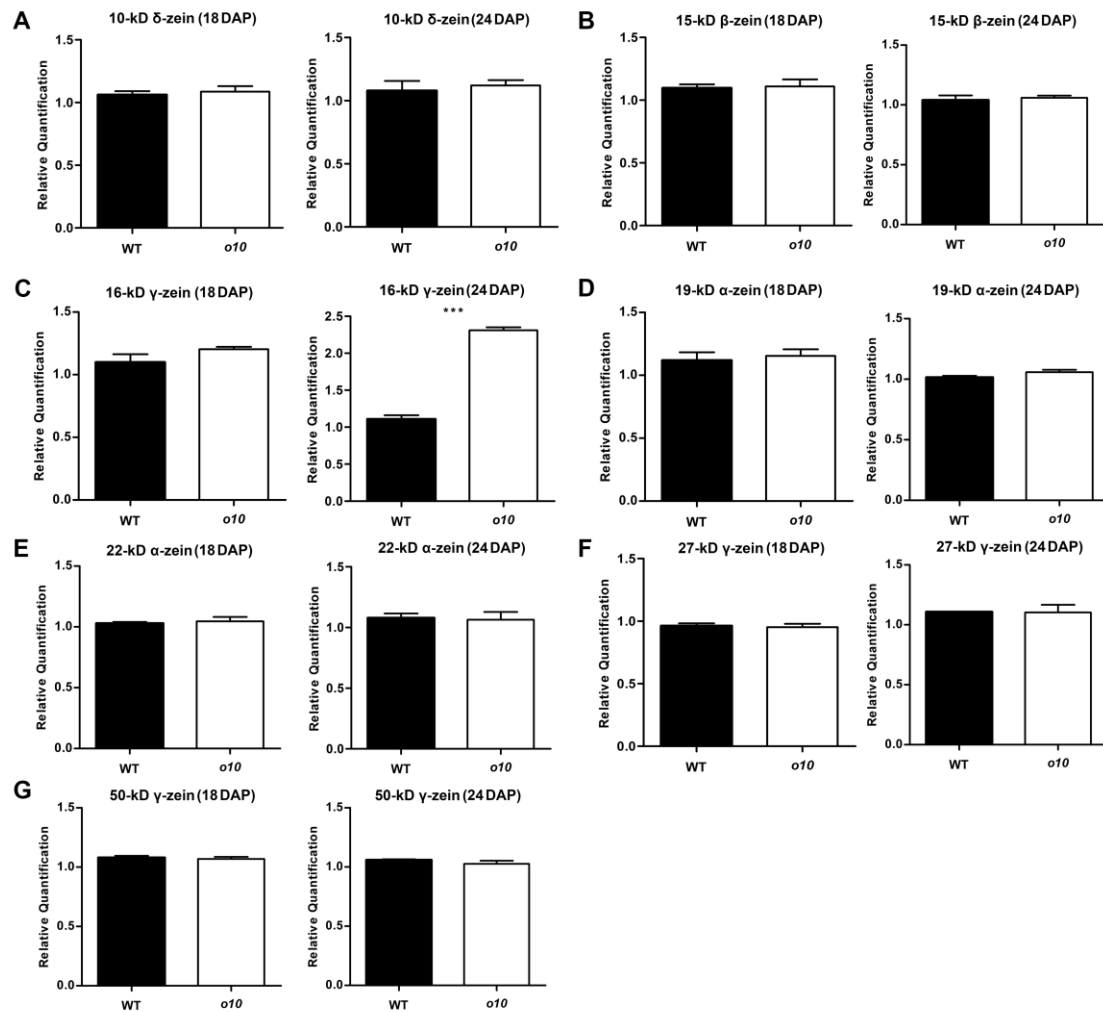

**S7 Fig. RNA expression analysis of different zein genes during maize kernel development.** (A) The expression of 10-kD  $\delta$ -zein in the wild-type and mutant kernels at 18DAP and 24DAP. (B) The expression of 15-kD  $\beta$ -zein in the wild-type and mutant kernels at 18DAP and 24DAP. (C) The expression of 16-kD  $\gamma$ -zein in the wild-type and mutant kernels at 18DAP and 24DAP. (D) The expression of 19-kD  $\alpha$ -zein in the wild-type and mutant kernels at 18DAP and 24DAP. (E) The expression of 22-kD  $\alpha$ -zein in the wild-type and mutant kernels at 18DAP and 24DAP. (F) The expression of 27-kD  $\gamma$ -zein in the wild-type and mutant kernels at 18DAP and 24DAP. (G) The expression of 50-kD  $\gamma$ -zein in the wild-type and mutant kernels at 18DAP and 24DAP. Ubiquitin was used as the internal control. For each sample, three technical and two independent biological replicates were performed. The values are the mean values with SE ( $n =$  three individuals; \*\*\* $P < 0.001$ , Student's  $t$  test).
