# Supplementary material for: Maize opaque10 Encodes a Cereal-Specific Protein That Is Essential for the Proper Distribution of Zeins in Endosperm Protein Bodies
Source: PubMed Central journal article supplement (PMC4991801; doi:10.1371/journal.pgen.1006270), 2016-08-19
Supplement: pgen.1006270.s008.pdf [file pgen.1006270.s008.pdf]

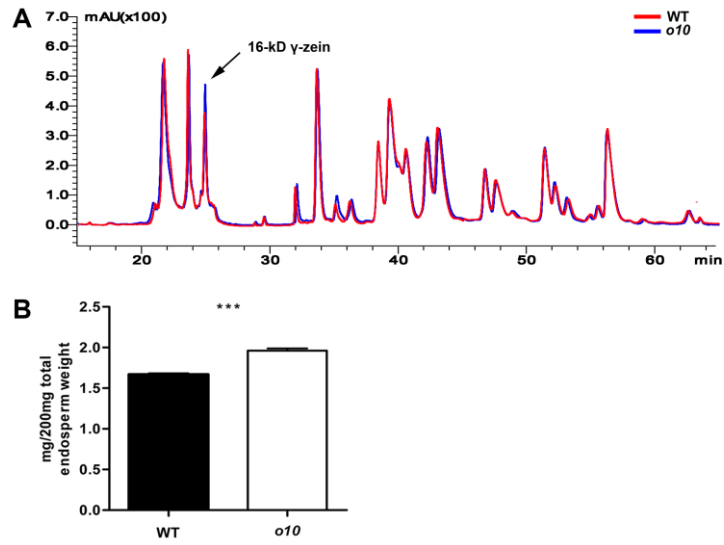

**S8 Fig. HPLC analysis of the content of 16-kD  $\gamma$ -zein in the wild-type and *o10* mature kernels.** (A) The peak diagram of HPLC from the determination of the zein content in mature kernels of the wild-type and *o10*. (B) The relative concentrations of 16-kD  $\gamma$ -zein in the wild-type and *o10* mature kernels.
