# Supplementary material for: Maize opaque10 Encodes a Cereal-Specific Protein That Is Essential for the Proper Distribution of Zeins in Endosperm Protein Bodies
Source: PubMed Central journal article supplement (PMC4991801; doi:10.1371/journal.pgen.1006270), 2016-08-19
Supplement: pgen.1006270.s009.pdf [file pgen.1006270.s009.pdf]

**S1 Table. The primers used in this study.**

| <b>Usage</b>         | <b>Primer Name</b>                   | <b>Sequence (5'-----3')</b>                |
|----------------------|--------------------------------------|--------------------------------------------|
| <b>Fine mapping</b>  | SSR192609-b                          | F:CTCTGTTCCGCGAAACGT                       |
|                      |                                      | R:ACTACCTGCTCAAGCTCCC                      |
|                      | SSR194164-c                          | F:TGGAGCAGCAGAGTTGGACG                     |
|                      |                                      | R:TGCAACGCCTGAGCGAGA                       |
|                      | SSR217401-a                          | F:TCACGCCACTTCCCTCATC                      |
|                      |                                      | R:GCACCACCAGCGGTCAAT                       |
|                      | SSR204586-b                          | F:CTTCTGCCTCGCCTCCACG                      |
|                      |                                      | R:GCTACTCGGCTACTCCACTTCA                   |
|                      | Indel557-1                           | F:CGAAACCGAGTCCGAATCCC                     |
|                      |                                      | R:GCTTACGGCTCCACGAGAACAT                   |
|                      | SSR194454-h                          | F:AGATGACTTTCATGGACGTT                     |
|                      |                                      | R:TTGGGGCATTGATTGTTA                       |
|                      | SSR194456-j                          | F:TAGACGTAAGTTGTTTAAGG                     |
|                      |                                      | R:GTCGCTTGACCTGATTAC                       |
| <b>Y2H construct</b> | 22-kD $\alpha$ -zein                 | F:GATCGAATTCTTCATTATTCCACAATGCTCACTTGCTCCT |
|                      |                                      | R:GATCGGATCCCTAAAAGATGGCACCTCCAACGATCG     |
|                      | 19-kD $\alpha$ -zein                 | F:AAAAGAATTCACAATTTTCCCTCAATGCTCACAAGCTCC  |
|                      |                                      | R:AAAAGGATCCCTAAAAGAGGGCACCAATGATGTGT      |
|                      | 15-kD $\beta$ -zein                  | F:AAAAGAATTCAGCGCCTCTGCAATGCAGATGCCC       |
|                      |                                      | R:AAAAGGATCCTCAGTAGTAGGGCGGAATGGCAGCGGAG   |
|                      | 16-kD $\gamma$ -zein                 | F:AAAAGAATTCTCCAGTACAAGCGGCGGCTGTGGCT      |
|                      |                                      | R:AAAACTCGAGTCAGTAGTAGACACCGCCGGCAGCTGC    |
|                      | 27-kD $\gamma$ -zein                 | F:AGCTGAATTCCATACAAGCGGCGGCTGCGGCTGC       |
|                      |                                      | R:AAAAGGACTTTCAGTGGGGGACACCGGCCGGC         |
|                      | 50-kD $\gamma$ -zein                 | F:CGCCATATGACACAGACAGGCGGCTGCAGC           |
|                      |                                      | R:GATCGGATCCTTATTTTGGTAGTATGAGTGGTAC       |
|                      | 10-kD $\delta$ -zein                 | F:GATCGAATTCATGACGCATATTCCAGGGCACT         |
|                      |                                      | R:GATCGGATCCCTAGAATGCAGCACCAACAAAG         |
|                      | O1-Tail                              | F:GCGGAATTCATGGCTGCAAATGAAGCT              |
|                      |                                      | R:GCCTGCAGCTATTGGGCAGGCTGTGGAT             |
|                      | FL1                                  | F:GCGAATTCATGGGCGGCAATAATGACG              |
|                      |                                      | R:CAGGATCCCTACTTCTTATCTCTGTCATCCTC         |
| HIP                  | F:ATGGCCATGGAGGCCATGGGGAAGCCCCGGG    |                                            |
|                      | R:GCGGATCCTTATGCATAGTGCATATGCTCTAGTA |                                            |
| <b>qRT-PCR</b>       | O10                                  | F:ATACCCTTGCTTGTGATG                       |
|                      |                                      | R:GCTGAAGTCTGATGGCTC                       |
|                      | Ubiquitin                            | F:CTGGTGCCCTCTCCATATGG                     |
|                      |                                      | R:CAACACTGACACGACTCATGACA                  |
|                      | 10-kD $\delta$ -zein                 | F:TCTCCTAGCTCTTTGTGCAAGCG                  |
|                      |                                      | R:ATGGCATGACTGGTGGCAAGTG                   |
|                      | 15-kD $\beta$ -zein                  | F:CATTCCGCCCTACTACTGATTC                   |
|                      |                                      | R:ATGATAATGTGTGTCGTCTTACTGC                |
|                      | 16-kD $\gamma$ -zein                 | F:TCTGAGTCTTGCTATCGAGGATGG                 |
|                      |                                      | R:GACCACCAACATTTCTCTCATCCC                 |

|                      |                             |
|----------------------|-----------------------------|
| 18-kD $\delta$ -zein | F:ACTCTGATTCCATCTCGCACAT    |
|                      | R:AACAAAGGGCTGCTGTAAAAAC    |
| 19-kD $\alpha$ -zein | F:GCTCCTTGGTCTTTCTGCAA      |
|                      | R:GGTAACTGCTGTAATAGGGCTGATG |
| 22-kD $\alpha$ -zein | F:TTCCACAATGCTCACTTGCT      |
|                      | R:GTTGTTGTAAGACGCTCGCC      |
| 27-kD $\gamma$ -zein | F:CCTCAGTGCCAGTCGTTGCG      |
|                      | R:TGGAGGACCAAGCCGAAGAT      |
| 50-kD $\gamma$ -zein | F:GTGCGGTGGCAATCTTGAC       |
|                      | R:TCTTCAATTGCAAACACCACTAA   |
